# Supplementary material
Source: MDPI journal article supplement (https://www.mdpi.com/2076-3263/9/3/117)
Supplement: s1 [file s1]

## Supplementary Materials

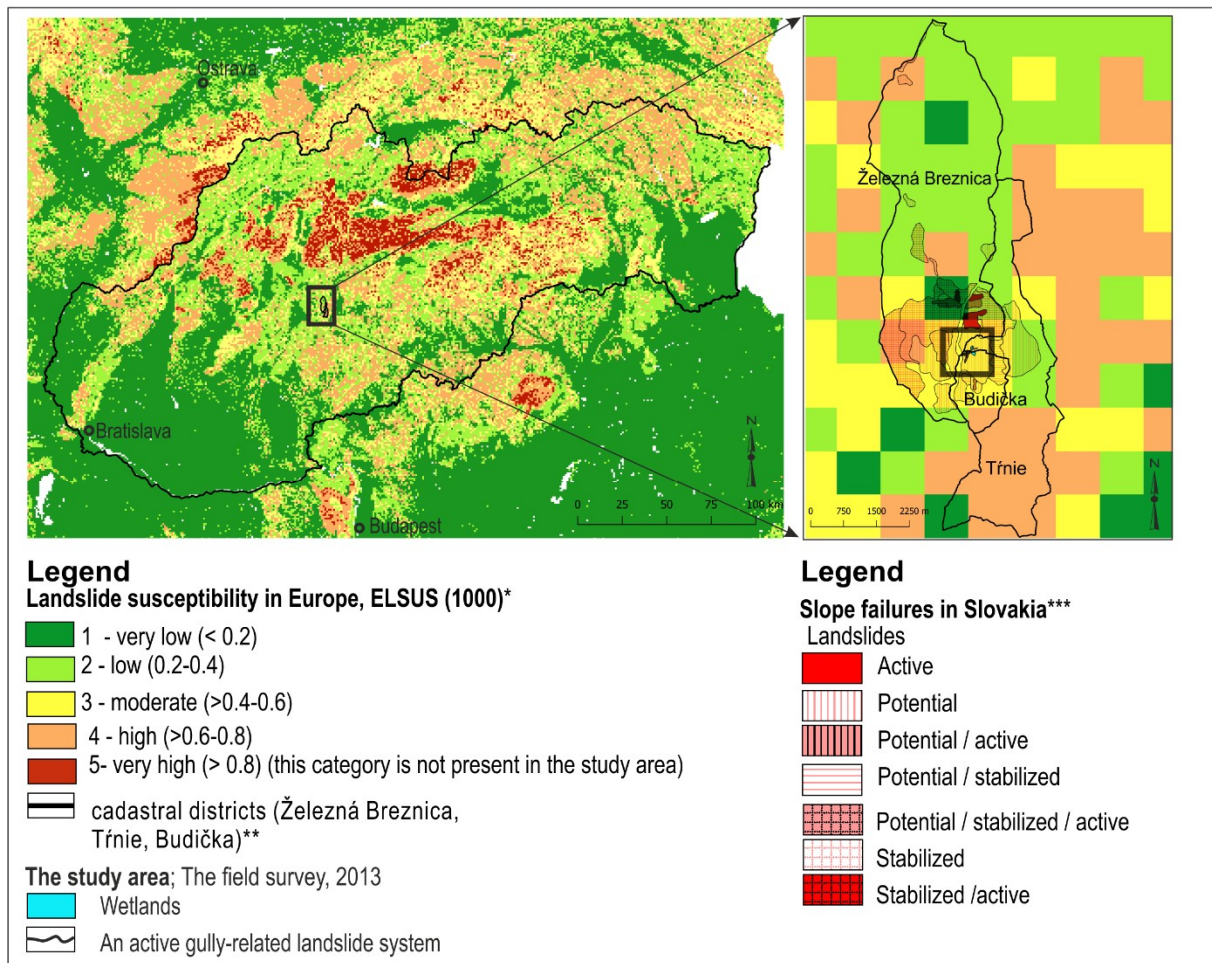

**Figure S1.** The study area in Slovakia and its location in ELSUS (1000) map with categories of landslide susceptibility, modified after [29] and the comparison with slope failures—landslides characterized in the national database of slope failures of the Slovak Republic, modified after [27, 28].

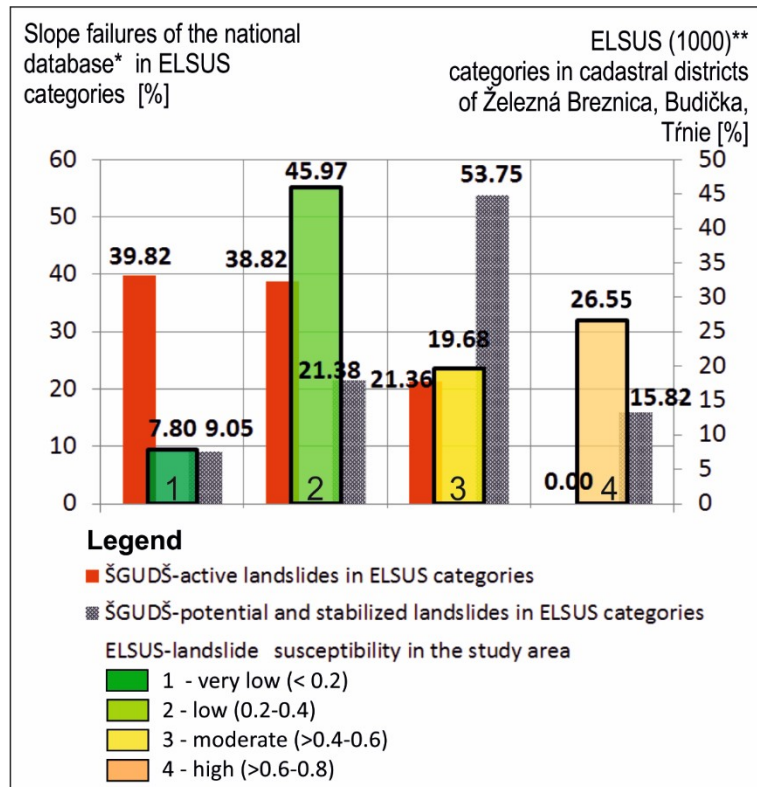

**Figure S2.** Categories of slope failures derived from the national database of the Slovak Republic, modified after [27, 28] within categories of landslide susceptibility derived from the ELSUS (1000) map, modified after [29] in the cadastral districts of Železná Breznica, Budička, and Trnie.

### Data computation and workflow S3. The LiDAR, RPAS and SfM CRP data processing workflow

#### LASTools

- Lasnoise

```
lasnoise -i Landslide-LAS \landslide_raw\ *.laz ^  
-step_xy 2 -step_z 0.5 -isolated 5 ^  
-classify_as 7^  
-odir Landslide-LAS \landslide_denoised -olaz ^
```

- Lasground\_new

```
Lasground_new -i Landslide-LAS \landslide_denoised\ *.laz ^  
-ignore_class 7 ^  
-natural -ultra_fine ^  
-compute_height ^  
-odir Landslide-LAS \landslide_ground -olaz ^
```

- Lasheight\_classify

```
Lasheight_classify -i Landslide-LAS \landslide_ground\ *.laz ^  
- classify -ground  
-drop below 0 above 0.1 ^  
-ignore_class 7 ^  
-odir Landslide-LAS \landslide_hieght -olaz ^
```

- Las2dem

```
las2dem -i \_ground\_ _height\ *.laz ^  
-step 0.15 -use_tile_bb ^  
-odir Landslide-LAS \landslide_dem -oasc ^
```

#### Quantum Geographic Information System 3.2.3. (QGIS) and in the System for Automated Geoscientific Analyses 2.3.2 (SAGA) - selected modules.

- Module of Slope, Aspect, Curvature. Terrain curvature, Maximal curvature.

```
saga_cmd ta_morphometry 0 [-C_MAXI <str>]
```

- Module of Valley Depth and Basic Terrain Analysis. The valley depth and the topographic wetness index.

```
saga_cmd ta_compound 0 [-WETNESS <str>] [-VALL_DEPTH <str>] [-RSP <str>] [-  
THRESHOLD <num>]
```

- Module of Sky View Factor. Sky View Factor.

```
saga_cmd ta_lighting 3 [-SVF <str>] [-NDIRS <num>]
```

- The calculation of basic micro-scale landforms characterizing the complex gully-related landslide

```
( "Maximal Curvature@1" * "skyviewfactor@1" ) - "valleydepth@1"
```

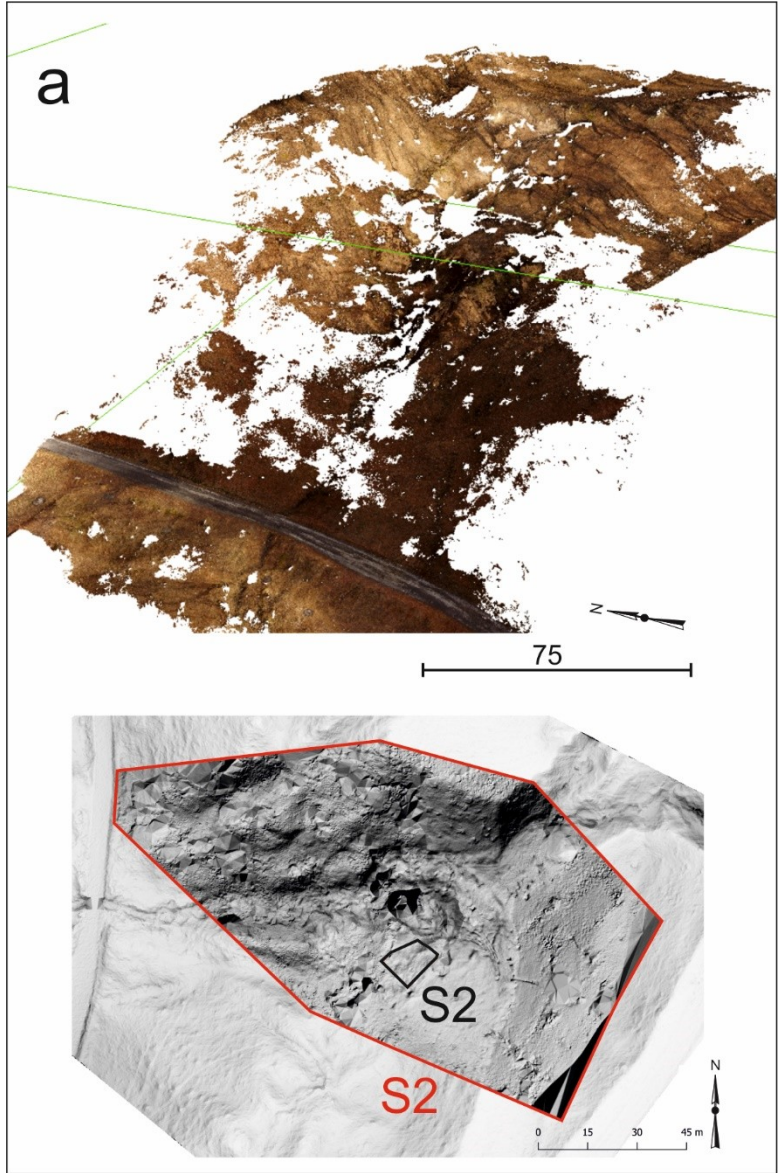

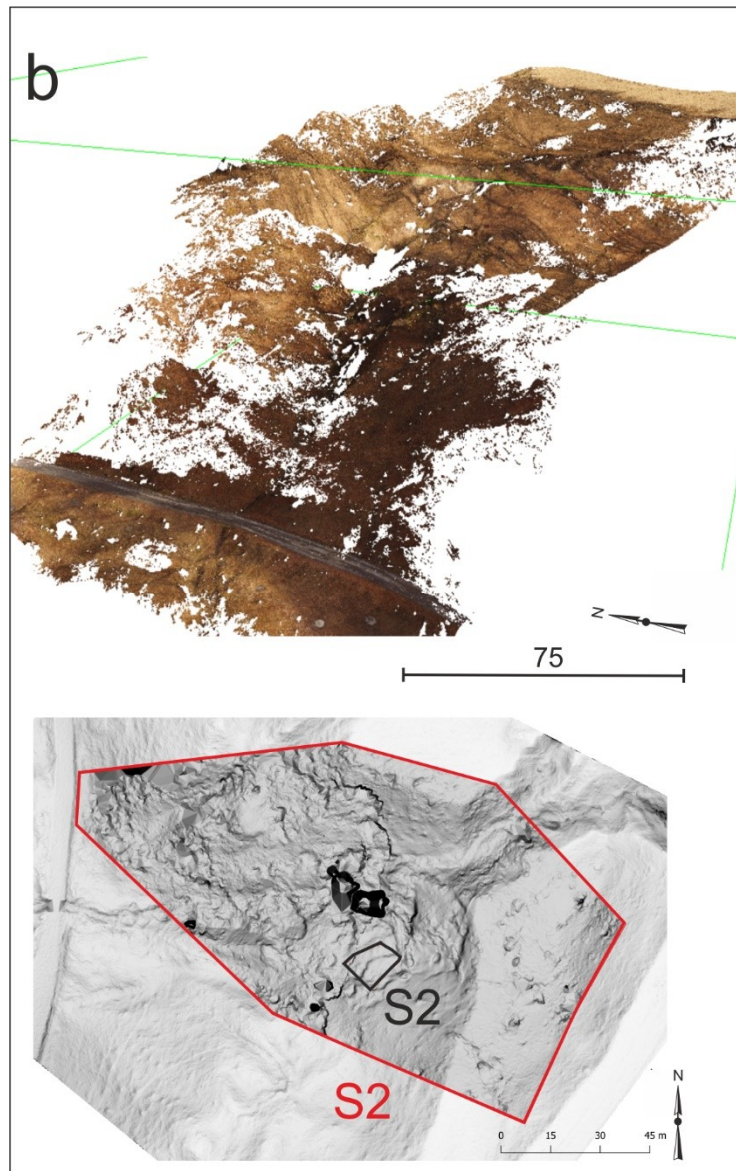

**Figure S4.** (a): Data gaps in point clouds acquired by the RPAS technology. Point clouds were filtered with the ground points classification; Sky View Factor highlights terrain discontinuities and obstructions in digital model derived from ground classified point clouds with more data gaps; (b): Point clouds were filtered with the ground points classification using the parameter from the height classification (drop points of the ground within interval from 0 m to 0.1 m); Sky View Factor highlights terrain discontinuities and obstructions in digital model derived from ground classified point clouds with less data gaps.
